# Supplementary material for: Source Apportionment of PM2.5 in Daejeon Metropolitan Region during January and May to June 2021 in Korea Using a Hybrid Receptor Model
Source: MDPI journal article supplement (doi:10.3390/atmos13111902), 2022-11-14
Supplement: s1 [file s1]

## Supplementary Materials:

Sang-Woo Han <sup>1</sup>, Hung-Soo Joo <sup>1</sup>, Hui-Jun Song <sup>1</sup>, Su-Bin Lee <sup>2</sup> and Jin-Seok Han <sup>1,\*</sup>

In this study, semi-continuous monitoring method was used for all real-time monitoring data of PM<sub>2.5</sub> mass concentrations, ions, carbonaceous compounds, and elements and 1-hour averaging data was expressed in this paper.

Ions were analyzed by an Ambient Ion Monitor (URG Co., 9000D, AIM) which was ion chromatograph (IC) system and the experimental conditions of IC were described as shown in Table S1.

**Table S1.** Analytical conditions of ion chromatography used in this study.

| Type             | Anion                         | Cation                         |
|------------------|-------------------------------|--------------------------------|
| Eluent           | KOH (10-45 mM)                | MSA (20 mM)                    |
| Flowrate         | 0.25 mL/min                   | 0.25 mL/min                    |
| Injection volume | 50 µl                         | 50 µl                          |
| Column           | Dionex, IonPacAG18, AS18 2mm  | Dionex, IonPacCGA12, CS12A 2mm |
| Suppressor       | Dionex, AERS500-2mm           | Dionex, CERS500-2mm            |
| Detector         | Dionex, Conductivity Detector | Dionex, Conductivity Detector  |
| Viewer           | Dionex, Chromeleon            | Dionex, Chromeleon             |

Carbonaceous compounds (organic carbon (OC) and elemental carbon (EC)) was analyzed by an OCEC Aerosol Analyzer. In the first step, OC was measured with helium gas and then EC was measured with the mixed gas of oxygen and helium gases in the second step. Table S2 shows the experimental conditions of gases and temperature for the analyzer.

**Table S2.** Gas/temperature conditions of the OCEC Aerosol Analyzer.

| Program Activity          | Carrier Gas             | Ramp Time (second) | Program Temperature |
|---------------------------|-------------------------|--------------------|---------------------|
| Oven Purge                | Helium                  | 10                 | 1                   |
| 1 <sup>st</sup> Ramp      | Helium                  | 70                 | 310                 |
| 2 <sup>ed</sup> Ramp      | Helium                  | 60                 | 480                 |
| 3 <sup>rd</sup> Ramp      | Helium                  | 60                 | 615                 |
| 4 <sup>th</sup> Ramp      | Helium                  | 90                 | 840                 |
| -                         | Helium                  | 30                 | 0                   |
| 1 <sup>st</sup> Ramp      | O <sub>2</sub> /Helium  | 35                 | 550                 |
| 2 <sup>nd</sup> Ramp      | O <sub>2</sub> /Helium  | 105                | 850                 |
| Internal Std. Calibration | CH <sub>4</sub> /Helium | 120                | 0                   |
| Cool down                 | Helium                  | 1                  | 0                   |

Table S3 shows the measurement detection limit (MDL) of PM<sub>2.5</sub> chemical compounds. MDL of Ions were ranged from 0.001 to 0.040 µg/m<sup>3</sup>, 0.297 µg/m<sup>3</sup> for OC, 0.0008 µg/m<sup>3</sup> for EC, and 0.0001 to 0.0008 µg/m<sup>3</sup> for elements, respectively.

**Table S3.** MDL of PM<sub>2.5</sub> components.

|         | Components                    | MDL     |          | Components | MDL     | Components | MDL     |
|---------|-------------------------------|---------|----------|------------|---------|------------|---------|
| Ions    | SO <sub>4</sub> <sup>2-</sup> | 0.00595 | Elements | Si         | 0.03690 | Cu         | 0.00022 |
|         | NO <sub>3</sub> <sup>-</sup>  | 0.01018 |          | S          | 0.00515 | Zn         | 0.00019 |
|         | Cl <sup>-</sup>               | 0.00966 |          | K          | 0.00309 | As         | 0.00016 |
|         | Na <sup>+</sup>               | 0.00328 |          | Ca         | 0.00069 | Se         | 0.00021 |
|         | NH <sub>4</sub> <sup>+</sup>  | 0.00218 |          | Ti         | 0.00036 | Br         | 0.00025 |
|         | K <sup>+</sup>                | 0.04444 |          | V          | 0.00034 | Ba         | 0.00088 |
|         | Mg <sup>2+</sup>              | 0.00106 |          | Cr         | 0.00025 | Pb         | 0.00030 |
|         | Ca <sup>2+</sup>              | 0.00286 |          | Mn         | 0.00032 |            |         |
| Carbons | OC                            | 0.29731 |          | Fe         | 0.00042 |            |         |
|         | EC                            | 0.00084 |          | Ni         | 0.00024 |            |         |
